# Supplementary material for: Detecting immunotherapy-sensitive subtype in gastric cancer using histologic image-based deep learning
Source: PubMed Central journal article supplement (PMC8608814; doi:10.1038/s41598-021-02168-4), 2021-11-22
Supplement: 41598_2021_2168_MOESM1_ESM.pdf [file 41598_2021_2168_MOESM1_ESM.pdf]

Supplementary Fig. S1. Data augmentation by changing colors randomly.

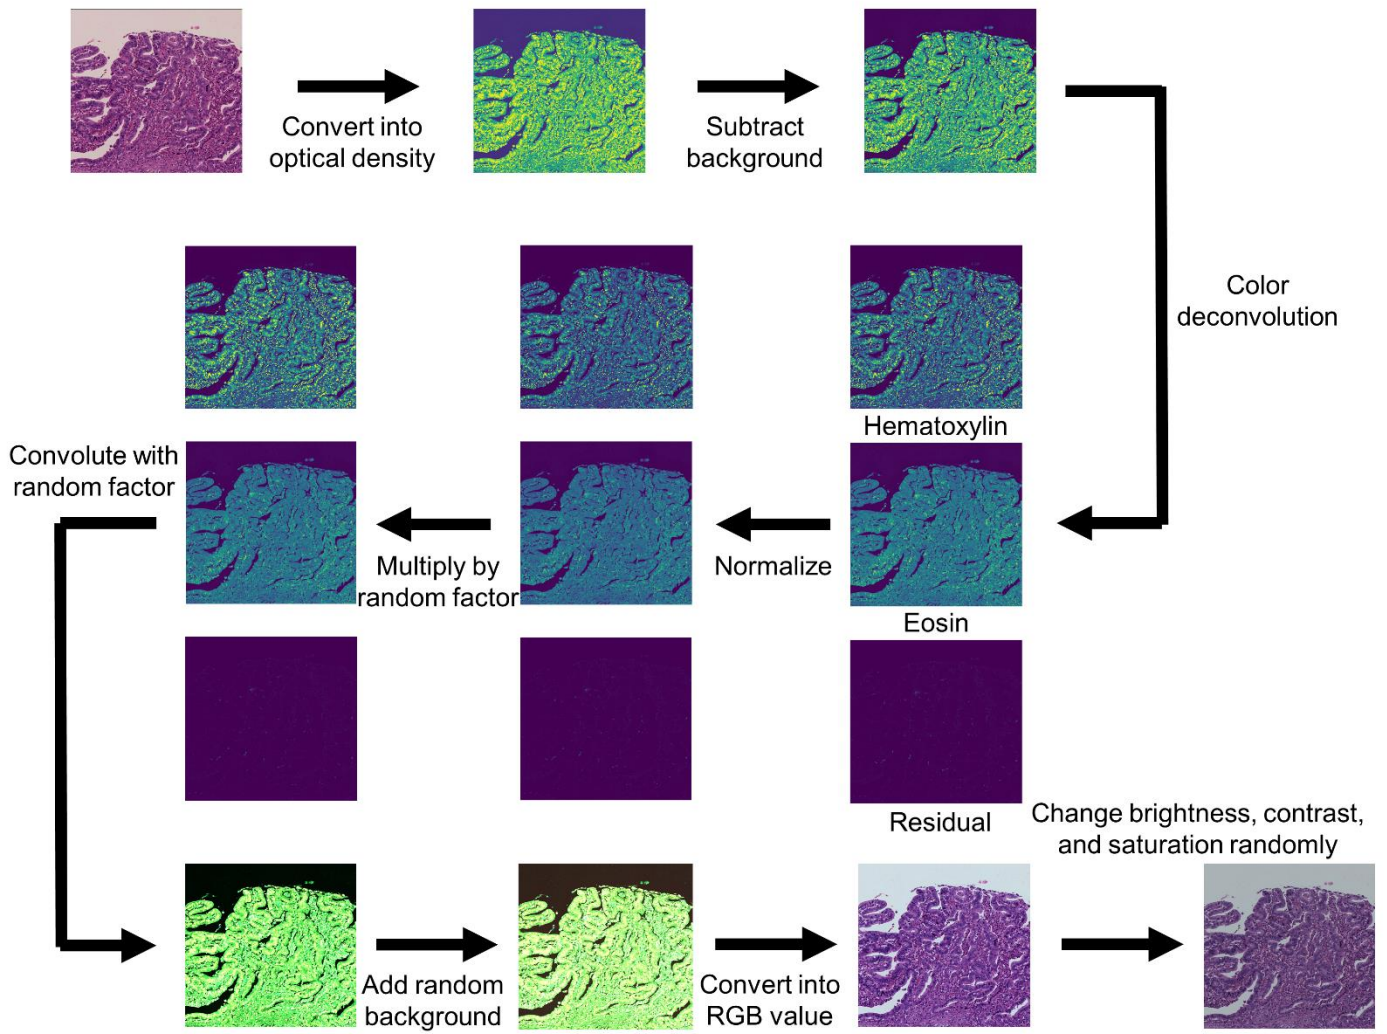

Supplementary Fig. S2. Architecture of deep learning models.

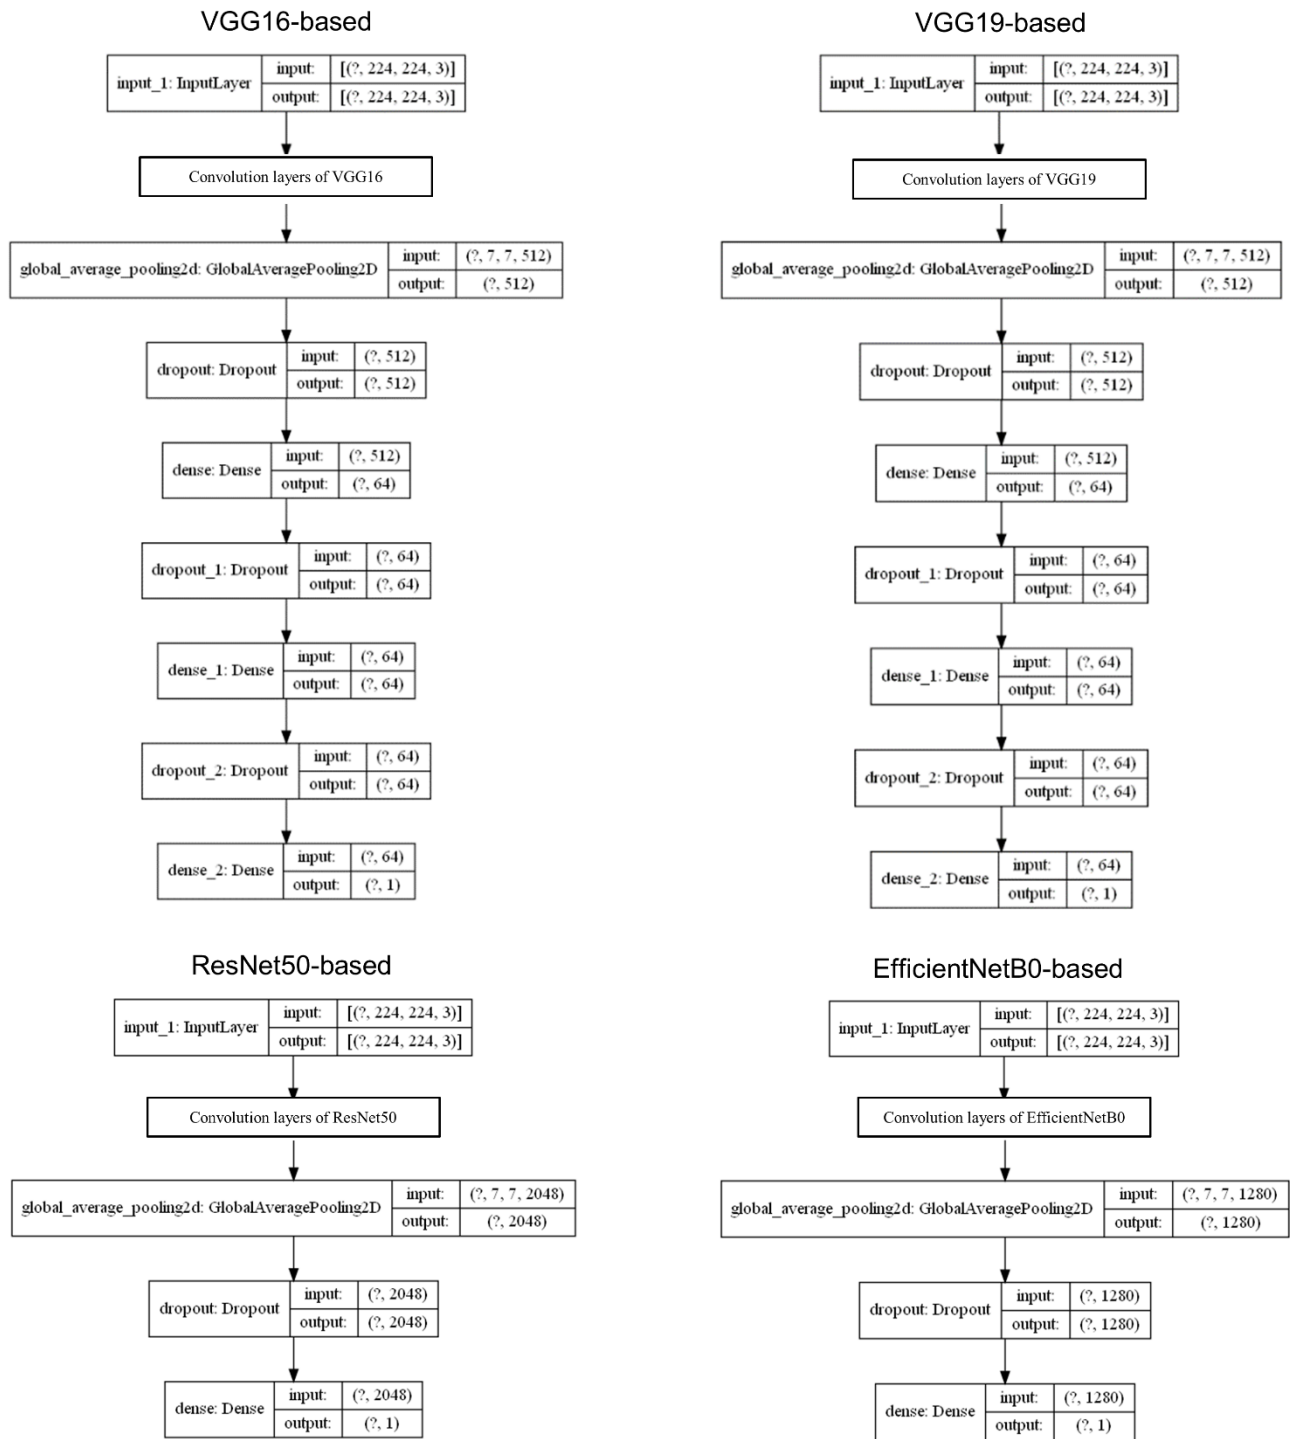

Supplementary Fig. S3. Tumor mutational burden of each subgroup. Patients were classified into EBV, MSI/dMMR, and others by the prediction of our deep learning model (a) or by the ground truth (b). \*:  $p < 0.001$ , Welch's t-test. EBV- Epstein-Barr virus, MSI- microsatellite instability, dMMR- mismatch repair deficiency.

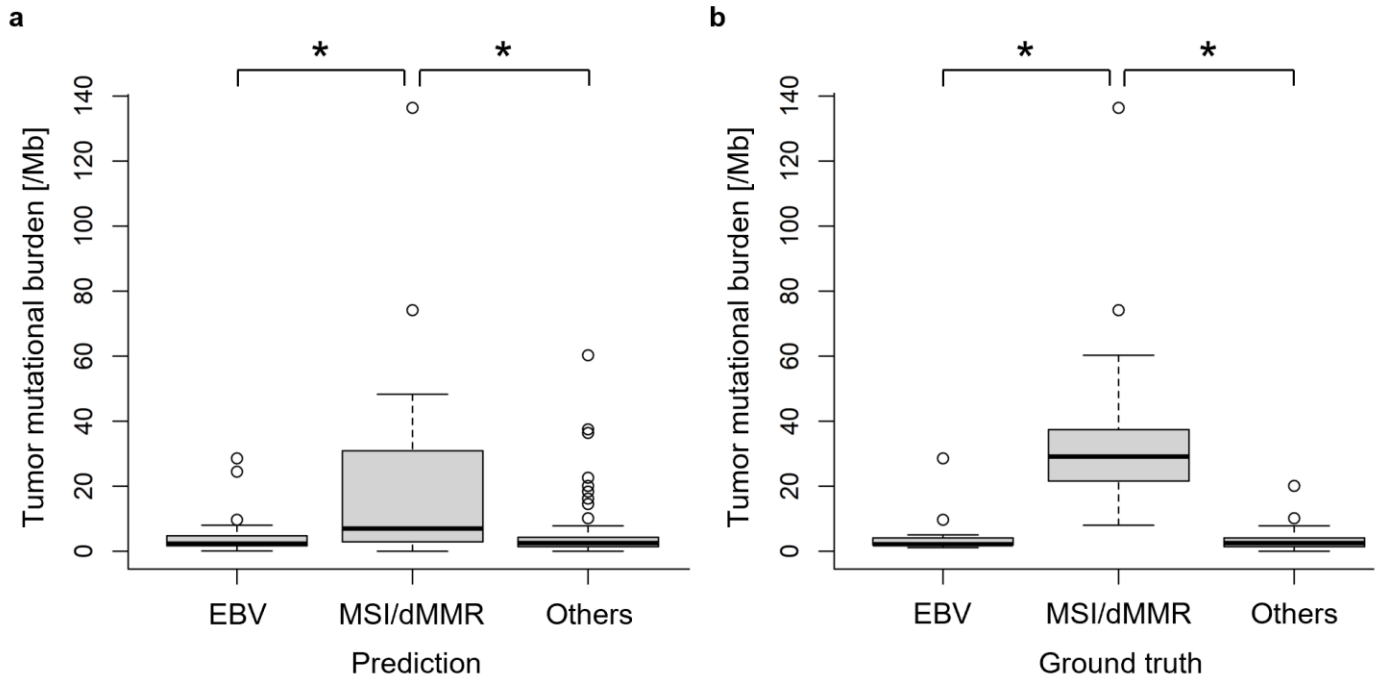

Supplementary Table S1. Checklist of STARD guideline.

| Section & Topic          | No         | Item                                                                                                                                                   | Reported on page # |
|--------------------------|------------|--------------------------------------------------------------------------------------------------------------------------------------------------------|--------------------|
| <b>TITLE OR ABSTRACT</b> |            |                                                                                                                                                        |                    |
|                          | <b>1</b>   | Identification as a study of diagnostic accuracy using at least one measure of accuracy (such as sensitivity, specificity, predictive values, or AUC)  | 2                  |
| <b>ABSTRACT</b>          |            |                                                                                                                                                        |                    |
|                          | <b>2</b>   | Structured summary of study design, methods, results, and conclusions (for specific guidance, see STARD for Abstracts)                                 | 2-3                |
| <b>INTRODUCTION</b>      |            |                                                                                                                                                        |                    |
|                          | <b>3</b>   | Scientific and clinical background, including the intended use and clinical role of the index test                                                     | 4-6                |
|                          | <b>4</b>   | Study objectives and hypotheses                                                                                                                        | 6                  |
| <b>METHODS</b>           |            |                                                                                                                                                        |                    |
| <i>Study design</i>      | <b>5</b>   | Whether data collection was planned before the index test and reference standard were performed (prospective study) or after (retrospective study)     | 6-8                |
| <i>Participants</i>      | <b>6</b>   | Eligibility criteria                                                                                                                                   | 6-8                |
|                          | <b>7</b>   | On what basis potentially eligible participants were identified (such as symptoms, results from previous tests, inclusion in registry)                 | 6-8                |
|                          | <b>8</b>   | Where and when potentially eligible participants were identified (setting, location and dates)                                                         | 6-8                |
|                          | <b>9</b>   | Whether participants formed a consecutive, random or convenience series                                                                                | 6-8                |
| <i>Test methods</i>      | <b>10a</b> | Index test, in sufficient detail to allow replication                                                                                                  | 8-13               |
|                          | <b>10b</b> | Reference standard, in sufficient detail to allow replication                                                                                          | 7-8                |
|                          | <b>11</b>  | Rationale for choosing the reference standard (if alternatives exist)                                                                                  | Not applicable     |
|                          | <b>12a</b> | Definition of and rationale for test positivity cut-offs or result categories of the index test, distinguishing pre-specified from exploratory         | 12                 |
|                          | <b>12b</b> | Definition of and rationale for test positivity cut-offs or result categories of the reference standard, distinguishing pre-specified from exploratory | Not applicable     |
|                          | <b>13a</b> | Whether clinical information and reference standard results were available to the performers/readers of the index test                                 | 29                 |
|                          | <b>13b</b> | Whether clinical information and index test results were available                                                                                     | Not applicable     |

|                          |            |                                                                                                             |                  |
|--------------------------|------------|-------------------------------------------------------------------------------------------------------------|------------------|
|                          |            | to the assessors of the reference standard                                                                  |                  |
| <i>Analysis</i>          | <b>14</b>  | Methods for estimating or comparing measures of diagnostic accuracy                                         | 12-13            |
|                          | <b>15</b>  | How indeterminate index test or reference standard results were handled                                     | Not applicable   |
|                          | <b>16</b>  | How missing data on the index test and reference standard were handled                                      | Not applicable   |
|                          | <b>17</b>  | Any analyses of variability in diagnostic accuracy, distinguishing pre-specified from exploratory           | 12-13            |
|                          | <b>18</b>  | Intended sample size and how it was determined                                                              | 6-7              |
| <b>RESULTS</b>           |            |                                                                                                             |                  |
| <i>Participants</i>      | <b>19</b>  | Flow of participants, using a diagram                                                                       | 7-8, Fig.2       |
|                          | <b>20</b>  | Baseline demographic and clinical characteristics of participants                                           | 14, Table 1      |
|                          | <b>21a</b> | Distribution of severity of disease in those with the target condition                                      | 14, Table 1      |
|                          | <b>21b</b> | Distribution of alternative diagnoses in those without the target condition                                 | 14, Table 1      |
|                          | <b>22</b>  | Time interval and any clinical interventions between index test and reference standard                      | Not applicable   |
| <i>Test results</i>      | <b>23</b>  | Cross tabulation of the index test results (or their distribution) by the results of the reference standard | 24 (online data) |
|                          | <b>24</b>  | Estimates of diagnostic accuracy and their precision (such as 95% confidence intervals)                     | 15-16            |
|                          | <b>25</b>  | Any adverse events from performing the index test or the reference standard                                 | Not applicable   |
| <b>DISCUSSION</b>        |            |                                                                                                             |                  |
|                          | <b>26</b>  | Study limitations, including sources of potential bias, statistical uncertainty, and generalisability       | 23               |
|                          | <b>27</b>  | Implications for practice, including the intended use and clinical role of the index test                   | 22               |
| <b>OTHER INFORMATION</b> |            |                                                                                                             |                  |
|                          | <b>28</b>  | Registration number and name of registry                                                                    | Not applicable   |
|                          | <b>29</b>  | Where the full study protocol can be accessed                                                               | Not applicable   |
|                          | <b>30</b>  | Sources of funding and other support; role of funders                                                       | Not applicable   |

Supplementary Table S2. Hyperparameters used for training deep learning models.

|                                                     | VGG16-based          |                        | VGG19-based          |                        | ResNet50-based       |                        | EfficientNetB0-based |                        |
|-----------------------------------------------------|----------------------|------------------------|----------------------|------------------------|----------------------|------------------------|----------------------|------------------------|
|                                                     | Transfer learning    | Successive fine tuning | Transfer learning    | Successive fine tuning | Transfer learning    | Successive fine tuning | Transfer learning    | Successive fine tuning |
| Batch size                                          | 256                  | 256                    | 256                  | 256                    | 256                  | 256                    | 256                  | 256                    |
| Optimizer                                           | Adam                 | SGD                    | Adam                 | SGD                    | Adam                 | SGD                    | Adam                 | SGD                    |
| Learning rate                                       | $1.0 \times 10^{-3}$ | $2.0 \times 10^{-5}$   | $1.0 \times 10^{-3}$ | $2.0 \times 10^{-5}$   | $1.0 \times 10^{-3}$ | $2.0 \times 10^{-5}$   | $1.0 \times 10^{-3}$ | $1.0 \times 10^{-4}$   |
| Cumulative total number of images used for training | 1,280,000            | 3,584,000              | 1,280,000            | 4,275,200              | 512,000              | 3,584,000              | 512,000              | 5,990,400              |

Deep learning models were first trained with convolution layers frozen (transfer learning), and then trained entirely with small learning rate (successive fine tuning).

Supplementary Table S3. Pathological information of cohorts included in this study.

| Parameters                                                              | TCGA (training) | TCGA (test) | TCGA (all)  |
|-------------------------------------------------------------------------|-----------------|-------------|-------------|
| Total number of samples                                                 | 48              | 196         | 244         |
| Molecular classification                                                |                 |             |             |
| EBV                                                                     | 5 (10.4%)       | 18 (9.2%)   | 23 (9.4%)   |
| MSI/dMMR                                                                | 8 (16.7%)       | 36 (18.4%)  | 44 (18.0%)  |
| Others                                                                  | 35 (72.9%)      | 142 (72.4%) | 177 (72.5%) |
| CIN                                                                     | 25 (52.1%)      | 102 (52.0%) | 127 (52.0%) |
| GS                                                                      | 10 (20.8%)      | 40 (20.4%)  | 50 (20.5%)  |
| Lauren classification for EBV-negative and microsatellite stable tumors |                 |             |             |
| Intestinal                                                              | 22 (62.9%)      | 92 (64.8%)  | 114 (64.4%) |
| Diffuse                                                                 | 10 (28.6%)      | 41 (28.9%)  | 51 (28.8%)  |
| Mixed                                                                   | 3 (8.6%)        | 8 (5.6%)    | 11 (6.2%)   |
| NA                                                                      | 0 (0.0%)        | 1 (0.7%)    | 1 (0.6%)    |
| pT stage                                                                |                 |             |             |
| pT1                                                                     | 0 (0.0%)        | 9 (4.6%)    | 9 (3.7%)    |
| pT2                                                                     | 6 (12.5%)       | 30 (15.3%)  | 36 (14.8%)  |
| pT3                                                                     | 32 (66.7%)      | 110 (56.1%) | 142 (58.2%) |
| pT4                                                                     | 10 (20.8%)      | 47 (24.0%)  | 57 (23.4%)  |

TCGA, The cancer genome atlas; EBV, Epstein-Barr virus; MSI, Microsatellite instability; dMMR, mismatch repair deficiency; CIN, chromosomal instable; GS, genomically stable; NA, not available.
